# Supplementary material for: Operational Seasonal Water Supply and Water Level Forecasting for the Laurentian Great Lakes
Source: Atypon-hosted journal article supplement (doi:10.1061/(asce)wr.1943-5452.0001214), 2020-06-17
Supplement: supplemental_materials_wr.1943-5452.0001214_fry.pdf [file supplemental_materials_wr.1943-5452.0001214_fry.pdf]

## SUPPLEMENTAL MATERIALS

*ASCE Journal of Water Resources Planning and Management*

# Operational Seasonal Water Supply and Water Level Forecasting for the Laurentian Great Lakes

Lauren M. Fry, Deanna Apps, and Andrew D. Gronewold

**DOI:** 10.1061/(ASCE)WR.1943-5452.0001214

© ASCE 2020

[www.ascelibrary.org](http://www.ascelibrary.org)







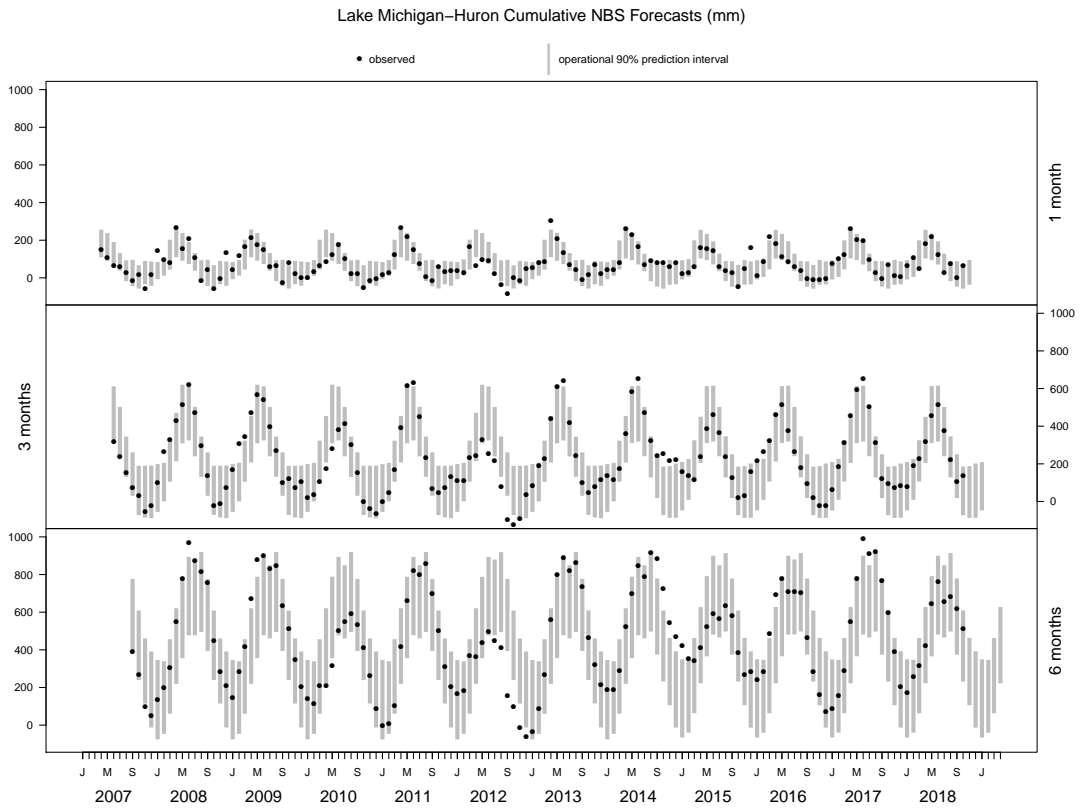

Fig. S4: Range in cumulative NBS used to produce the water level forecast uncertainty.





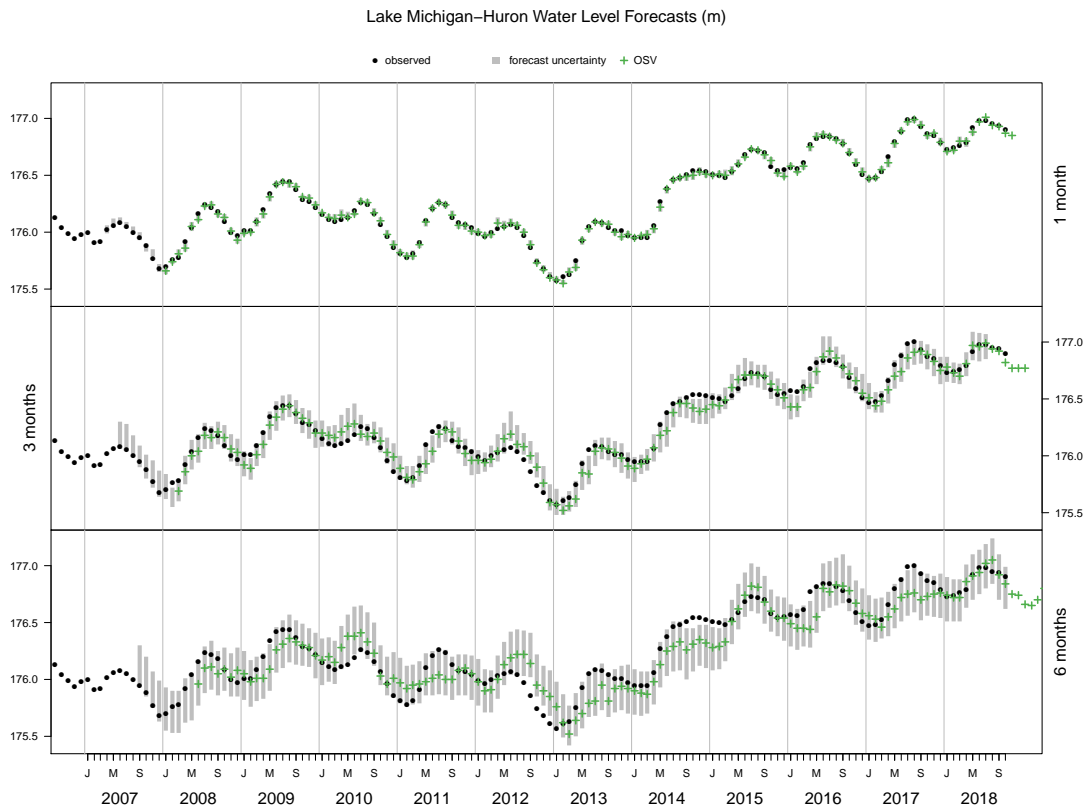

Fig. S7: Water level forecasts for Lake Michigan-Huron resulting from the operator-selected NBS forecasts included in this analysis. Gray bars represent the range of uncertainty in forecasts determined using the operational 5% and 95% supplies.



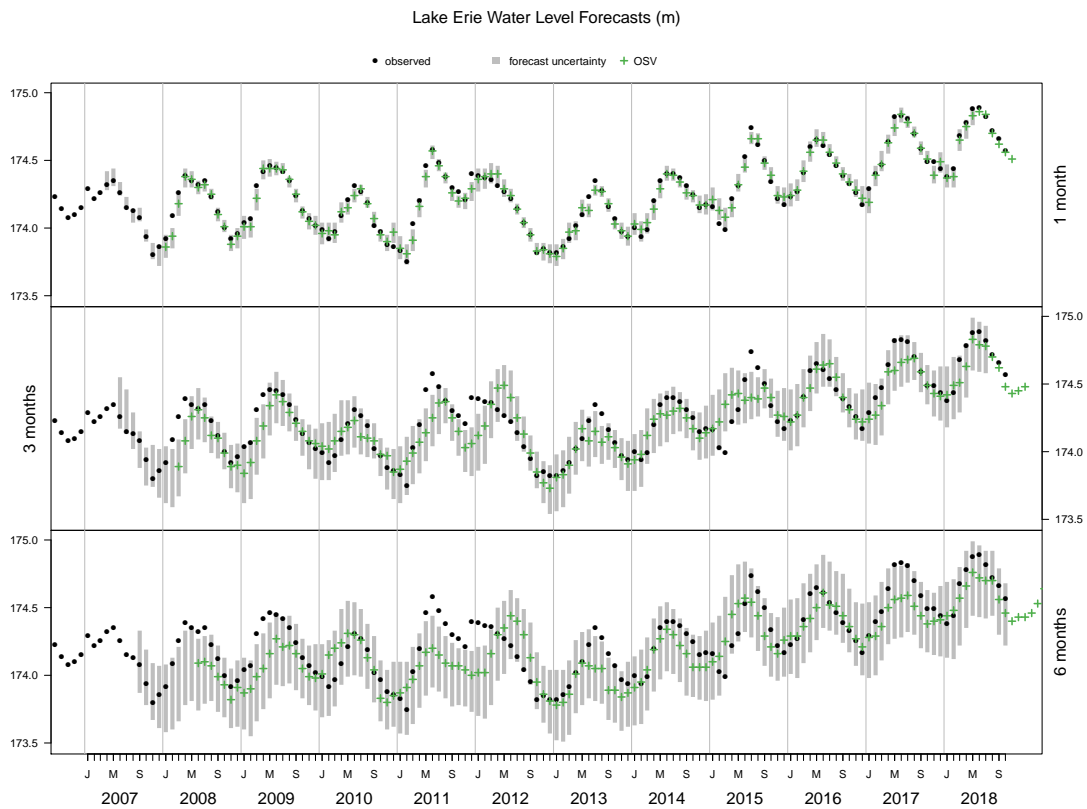

Fig. S8: Water level forecasts for Lake Erie resulting from the operator-selected NBS forecasts included in this analysis. Gray bars represent the range of uncertainty in forecasts determined using the operational 5% and 95% supplies.
